# Supplementary material for: In Vitro and In Vivo Evaluation of Human Adenovirus Type 49 as a Vector for Therapeutic Applications
Source: MDPI journal article supplement (doi:10.3390/v13081483), 2021-07-28

### Supplemental Figure 1 (S1): Luminex quantification of cytokine and chemokine levels

HAdV-C5 or HAdV-D49 ( $1 \times 10^{11}$ vp) vectors encoding luciferase were administered by *intravenous* injection. Cytokine and chemokine analysis of sera was performed using a mouse cytokine 20-plex luminex panel quantifying levels of basic fibroblast growth factor (bFGF), granulocyte macrophage colony-stimulating factor (GM-CSF), interferon-gamma (IFN- $\gamma$ ), interleukin (IL) 1 $\alpha$ , IL-1 $\beta$ , IL-2, IL-4, IL-5, IL-6, IL-10, IL-12(p40/p70), IL-13, IL-17, IFN-induced protein (IP10), keratinocyte-derived cytokine (KC), monocyte chemoattractant protein (MCP-1), monokine induced by gamma interferon (MIG), macrophage inflammatory protein-1 $\alpha$  (MIP-1 $\alpha$ ), tumour necrosis factor- $\alpha$  (TNF- $\alpha$ ) and vascular endothelial growth factor (VEGF). IL-10, IL-13 and KC values  $< 1$  and are therefore not plotted. Data and statistics are summarised in Figure 2E.

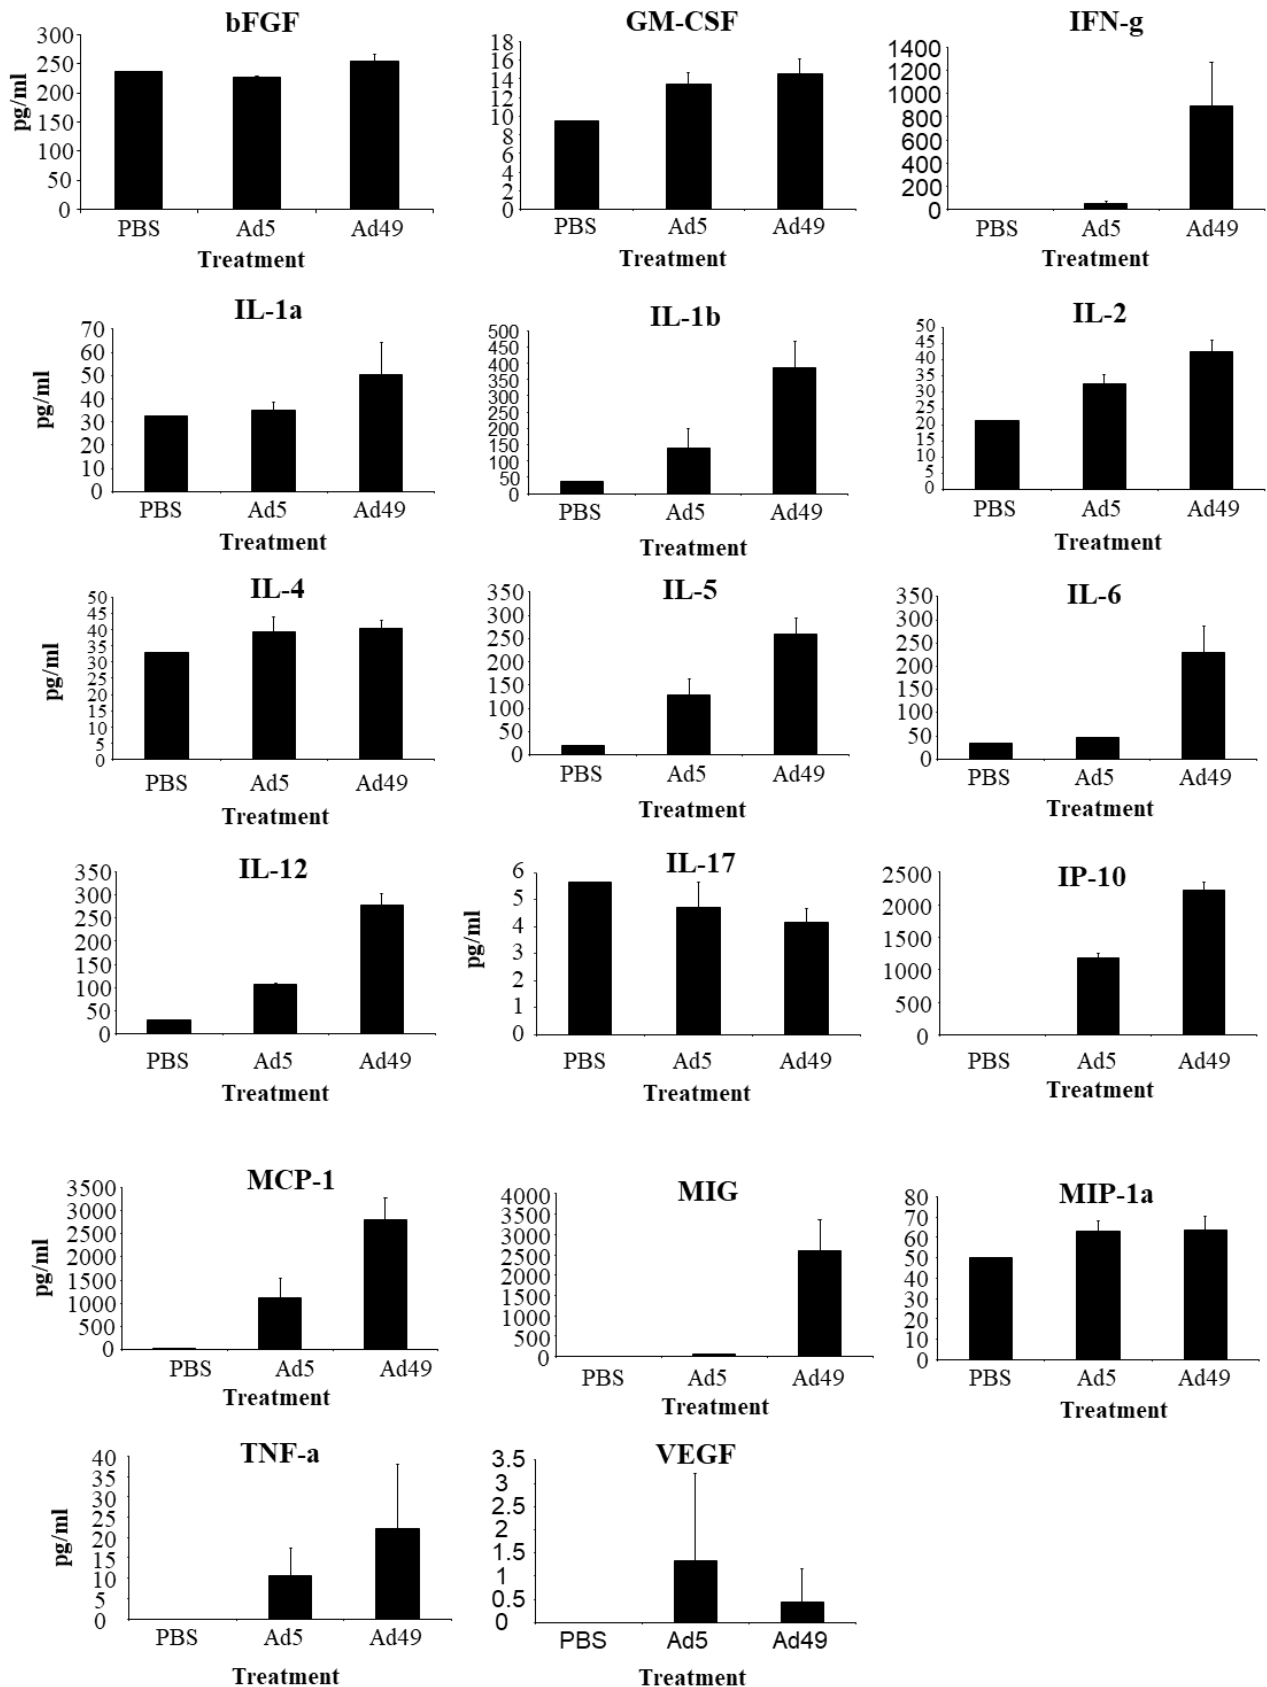

Supplement: s1 [file s1]
